# Supplementary material
Source: PubMed Central journal article supplement (PMC9384346)
Supplement: mmc1.pdf [file mmc1.pdf]

**Supplementary Table S1.**

**GISAID Patient Status Metadata Encodings.** Mapping scheme used for raw patient status metadata. The mapping is to a patient status which is then mapped to a category and classification according to Supplementary Table S2 as detailed in the Methods section.

| Original                                             | Map1            |
|------------------------------------------------------|-----------------|
| 18                                                   | Unknown         |
| 28                                                   | Unknown         |
| 37                                                   | Unknown         |
| 38                                                   | Unknown         |
| 42                                                   | Unknown         |
| 43                                                   | Unknown         |
| 44                                                   | Unknown         |
| 45                                                   | Unknown         |
| 51                                                   | Unknown         |
| 54                                                   | Unknown         |
| 55                                                   | Unknown         |
| 58                                                   | Unknown         |
| 59                                                   | Unknown         |
| 61                                                   | Unknown         |
| 67                                                   | Unknown         |
| 68                                                   | Unknown         |
| 71                                                   | Unknown         |
| 103                                                  | Unknown         |
| Active                                               | Active          |
| ACTIVE                                               | Active          |
| Acute bronchitis                                     | Acute infection |
| Acute upper respiratory infection, unspecified       | Acute infection |
| Acute upper respiratory infections                   | Acute infection |
| Acute upper respiratory tract infection, unspecified | Acute infection |
| acute viral respiratory infection                    | Acute infection |
| Acute viral respiratory infection                    | Acute infection |
| Admitted for 6 Days in Bharatpur Hospital            | Hospitalized    |
| Airport surveillance                                 | Screening       |
| airport surveillance                                 | Screening       |
| Alive                                                | Alive           |
| alive                                                | Alive           |
| Ambulant                                             | Ambulatory      |
| Ambulatoriale                                        | Ambulatory      |
| Ambulatory                                           | Ambulatory      |

*Predicting COVID-19 Disease Severity from SARS-CoV-2 Spike Protein Sequence by Mixed Effects Machine Learning – B.A. Sokhansanj & G.L. Rosen – Supplementary Table S1*

| <b>Original</b>                                                        | <b>Map1</b>                  |
|------------------------------------------------------------------------|------------------------------|
| AMBULATORY - UNDER TREATMENT                                           | Ambulatory / Under treatment |
| Ambulatory - Under Treatment                                           | Ambulatory / Under treatment |
| Ambulatory symptomatic                                                 | Mild                         |
| Ambulatory treatment                                                   | Ambulatory                   |
| Amublant                                                               | Ambulatory                   |
| Animal showing generalized sickness                                    | Unknown                      |
| ARV clinic                                                             | Unknown                      |
| Asympomatic                                                            | Asymptomatic                 |
| asymptomatic                                                           | Asymptomatic                 |
| ASYMPTOMATIC                                                           | Asymptomatic                 |
| Asymptomatic                                                           | Asymptomatic                 |
| Asymptomatic - Ambulatory                                              | Asymptomatic                 |
| Asymptomatic ambulatory                                                | Asymptomatic                 |
| Asymptomatic and Ambulatory                                            | Asymptomatic                 |
| Asymptomatic, identified as positive during preoperation investigation | Asymptomatic                 |
| Asymptomatic/Mild                                                      | Asymptomatic/Mild            |
| Asymptomatic/Released                                                  | Asymptomatic                 |
| Asymptomatyc                                                           | Asymptomatic                 |
| Asymtomatic                                                            | Asymptomatic                 |
| Aymptomatic                                                            | Asymptomatic                 |
| B34.2 Coronavirus infection, unspecified site                          | Unknown                      |
| Blank                                                                  | Unknown                      |
| Bronchitis                                                             | Bronchitis                   |
| Bronchoalveolar lavage                                                 | Unknown                      |
| casualty                                                               | Casualty                     |
| Casualty                                                               | Casualty                     |
| Chronic dialysis                                                       | Unknown                      |
| Clinic                                                                 | Unknown                      |
| Clinical signs                                                         | Symptomatic                  |
| Cluster                                                                | Unknown                      |
| Community screening                                                    | Screening                    |
| Community Surveillance                                                 | Screening                    |
| Confirmed                                                              | Unknown                      |
| Confirmed SAD                                                          | Unknown                      |
| Confirmed SAD-SAD                                                      | Unknown                      |
| Confirmed SCTE                                                         | Unknown                      |
| Conjunctivitis                                                         | Mild                         |
| Contact                                                                | Screening                    |

*Predicting COVID-19 Disease Severity from SARS-CoV-2 Spike Protein Sequence by Mixed Effects Machine Learning – B.A. Sokhansanj & G.L. Rosen – Supplementary Table S1*

| <b>Original</b>                                               | <b>Map1</b>  |
|---------------------------------------------------------------|--------------|
| Contact and possible infection with other infectious diseases | Screening    |
| Contact surveillance                                          | Screening    |
| Contact with and exposure to other communicable diseases      | Screening    |
| Contact-SAD                                                   | Screening    |
| Contained                                                     | Unknown      |
| Coronavirus infection                                         | Unknown      |
| Cough                                                         | Mild         |
| COVID-19                                                      | Unknown      |
| Critical                                                      | Critical     |
| CRITICAL                                                      | Critical     |
| critical care admitted                                        | Severe       |
| Culled for pelting                                            | Unknown      |
| Cured                                                         | Recovered    |
| DAMA                                                          | Unknown      |
| dead                                                          | Dead         |
| Dead                                                          | Dead         |
| dead or alive, hospitalised or release                        | Unknown      |
| Dead, hospitalized                                            | Dead         |
| Death                                                         | Dead         |
| Decease                                                       | Dead         |
| Deceased                                                      | Dead         |
| deceased                                                      | Dead         |
| Demise                                                        | Dead         |
| Demised                                                       | Dead         |
| Demised patient                                               | Dead         |
| Demised patient (Vaccinated first dose)                       | Dead         |
| Desceased                                                     | Dead         |
| Died                                                          | Dead         |
| DIED                                                          | Dead         |
| Discharged                                                    | Released     |
| Discharged after recovery                                     | Released     |
| Diseased                                                      | Symptomatic  |
| Domestic infection                                            | Unknown      |
| EHPAD                                                         | Unknown      |
| EHPAD_IRA                                                     | Unknown      |
| Emergency Care                                                | Hospitalized |
| Encounter for general adult medical examination               | Screening    |

*Predicting COVID-19 Disease Severity from SARS-CoV-2 Spike Protein Sequence by Mixed Effects Machine Learning – B.A. Sokhansanj & G.L. Rosen – Supplementary Table S1*

| <b>Original</b>                                                                 | <b>Map1</b>                |
|---------------------------------------------------------------------------------|----------------------------|
| Encounter for general adult medical examination (Z.00)                          | Screening                  |
| Encounter for observation for other suspected diseases and conditions ruled out | Symptomatic                |
| Encounter for other specified special examinations (Z01.8)                      | Unknown                    |
| Epidemiology Study                                                              | Screening                  |
| Etude                                                                           | Unknown                    |
| Exitus                                                                          | Dead                       |
| Facility quarantine                                                             | Screening                  |
| Family medical ward                                                             | Hospitalized               |
| Female                                                                          | Unknown                    |
| Fever                                                                           | Mild                       |
| Flu-like symptoms                                                               | Flu-like                   |
| General clinic                                                                  | Unknown                    |
| General Medical Screening                                                       | Screening                  |
| HCW - Mild Covid                                                                | Mild                       |
| Headache                                                                        | Mild                       |
| Headache, Nasal Congestions and generalised body ache                           | Mild                       |
| Healthcare worker                                                               | Unknown                    |
| Healthcare Worker                                                               | Unknown                    |
| Healthworker                                                                    | Unknown                    |
| Helen Joseph ward                                                               | Unknown                    |
| High temperature                                                                | Mild                       |
| Home                                                                            | Home                       |
| home                                                                            | Home                       |
| Hospitalized                                                                    | Hospitalized               |
| Hospital discharge                                                              | Released                   |
| Hospitalised                                                                    | Hospitalized               |
| Hospitalised oncology urology                                                   | Hospitalized               |
| HOSPITALIZADO                                                                   | Hospitalized               |
| Hospitalized                                                                    | Hospitalized               |
| hospitalized                                                                    | Hospitalized               |
| Hospitalized - Non-Serious Case                                                 | Hospitalized / Not Serious |
| HOSPITALIZED - NON-SERIOUS CASE                                                 | Hospitalized / Serious     |

*Predicting COVID-19 Disease Severity from SARS-CoV-2 Spike Protein Sequence by Mixed Effects Machine Learning – B.A. Sokhansanj & G.L. Rosen – Supplementary Table S1*

| <b>Original</b>                                                                           | <b>Map1</b>                 |
|-------------------------------------------------------------------------------------------|-----------------------------|
| HOSPITALIZED - SERIOUS CASE                                                               | Hospitalized / Serious      |
| Hospitalized - Serious Case                                                               | Hospitalized / Serious      |
| Hospitalized (Critical)                                                                   | Hospitalized / Serious      |
| Hospitalized (Deceased)                                                                   | Dead                        |
| Hospitalized (deceased)                                                                   | Dead                        |
| Hospitalized (ICU)                                                                        | Severe                      |
| Hospitalized (Intensive care unit and Released)                                           | Severe                      |
| Hospitalized (Intensive care unit)                                                        | Severe                      |
| Hospitalized (Live)                                                                       | Hospitalized                |
| Hospitalized (Mild)                                                                       | Hospitalized / Mild         |
| Hospitalized (Moderate)                                                                   | Hospitalized / Moderate     |
| Hospitalized (possible MIS-C)                                                             | Hospitalized / Serious      |
| Hospitalized (Released)                                                                   | Released                    |
| Hospitalized (Severe)                                                                     | Severe                      |
| Hospitalized (Stable)                                                                     | Hospitalized / Stable       |
| Hospitalized / ICU                                                                        | Severe                      |
| Hospitalized Asymptomatic                                                                 | Asymptomatic / Hospitalized |
| Hospitalized in intensive care                                                            | Severe                      |
| Hospitalized Symptomatic                                                                  | Hospitalized / Symptomatic  |
| Hospitalized(ICU)                                                                         | Severe                      |
| Hospitalized, Asymptomatic, Alive                                                         | Asymptomatic / Hospitalized |
| Hospitalized, Deceased                                                                    | Dead                        |
| Hospitalized, Discharged, Alive                                                           | Released                    |
| Hospitalized, ICU                                                                         | Severe                      |
| Hospitalized, ICU, deseased                                                               | Dead                        |
| Hospitalized, ICU, Died                                                                   | Dead                        |
| Hospitalized, Live                                                                        | Hospitalized                |
| Hospitalized, Live.                                                                       | Hospitalized                |
| Hospitalized, no clinical signs                                                           | Asymptomatic / Hospitalized |
| Hospitalized, noninvasive ventilation                                                     | Hospitalized                |
| Hospitalized, oxygenotherapy, diarrhea                                                    | Hospitalized                |
| Hospitalized, referred to Nepalganj Teaching hospital, stayed for 10 days and discharged. | Hospitalized                |
| Hospitalizede                                                                             | Hospitalized                |
| Hospitalizes                                                                              | Hospitalized                |
| Hospitallized                                                                             | Hospitalized                |
| Hospitarized                                                                              | Hospitalized                |
| Hospitilized                                                                              | Hospitalized                |
| Hospitalized                                                                              | Hospitalized                |

*Predicting COVID-19 Disease Severity from SARS-CoV-2 Spike Protein Sequence by Mixed Effects Machine Learning – B.A. Sokhansanj & G.L. Rosen – Supplementary Table S1*

| <b>Original</b>                                                                                       | <b>Map1</b>      |
|-------------------------------------------------------------------------------------------------------|------------------|
| Hospitalized                                                                                          | Hospitalized     |
| House assistance, Symptomatic                                                                         | House Assistance |
| Human                                                                                                 | Unknown          |
| ICD-10 Disease: B34.2 Coronavirus infection, unspecified                                              | Unknown          |
| ICD-10 Disease: B34.2 Coronavirus infection, unspecified site                                         | Unknown          |
| ICD-10 Disease: J00- Acute nasopharyngitis [common cold]                                              | Mild             |
| ICD-10 Disease: J00-J06 Acute upper respiratory infections                                            | Acute infection  |
| ICD-10 Disease: J02.9 Acute pharyngitis, unspecified                                                  | Acute infection  |
| ICD-10 Disease: J06.8 Other acute upper respiratory infections of multiple sites                      | Acute infection  |
| ICD-10 Disease: J06.9 Acute upper respiratory infection, unspecified                                  | Acute infection  |
| ICD-10 Disease: J18.1 Lobar pneumonia, unspecified organism                                           | Pneumonia        |
| ICD-10 Disease: J18.9 Pneumonia, unspecified organism                                                 | Pneumonia        |
| ICD-10 Disease: J40 Bronchitis, not specified as acute or chronic                                     | Bronchitis       |
| ICD-10 Disease: U07.1 COVID-19, virus identified                                                      | Unknown          |
| ICD-10 Disease: U07.2 COVID-19, virus not identified                                                  | Unknown          |
| ICD-10 Disease: U07.2 Virus not identified                                                            | Unknown          |
| ICD-10 Disease: Z00.0 Encounter for general adult medical examination                                 | Unknown          |
| ICD-10 Disease: Z00.0 Encounter for general adult medical examination without abnormal findings       | Symptomatic      |
| ICD-10 Disease: Z03.8 Encounter for observation for other suspected diseases and conditions ruled out | Symptomatic      |
| ICD-10 Disease: Z03.8 Observation for other suspected diseases and conditions                         | Symptomatic      |
| ICD-10 Disease: Z04 Encounter for examination and observation for other reasons                       | Unknown          |

*Predicting COVID-19 Disease Severity from SARS-CoV-2 Spike Protein Sequence by Mixed Effects Machine Learning – B.A. Sokhansanj & G.L. Rosen – Supplementary Table S1*

| <b>Original</b>                                                                                  | <b>Map1</b>          |
|--------------------------------------------------------------------------------------------------|----------------------|
| ICD-10 Disease: Z04.8 Encounter for examination and observation for request for expert evidence  | Unknown              |
| ICD-10 Disease: Z10.8 Routine general health check-up of other defined subpopulations            | Unknown              |
| ICD-10 Disease: Z11.5 Encounter for screening for other viral diseases                           | Unknown              |
| ICD-10 Disease: Z20.8 Contact with and exposure to other communicable diseases                   | Screening            |
| ICD-10 Disease: J06.9 Acute upper respiratory infection, unspecified                             | Acute infection      |
| ICD-10 Disease: Pneumonia                                                                        | Pneumonia            |
| ICD-10 Disease: Z00.00 Encounter for general adult medical examination without abnormal findings | Asymptomatic         |
| ICU                                                                                              | ICU                  |
| ICU, Deceased                                                                                    | Dead                 |
| ICU, Live                                                                                        | ICU                  |
| ICU; Serious                                                                                     | ICU                  |
| Immunocompromised                                                                                | Unknown              |
| Infection after vaccine/Live                                                                     | Unknown / Vaccinated |
| Influenza Like Illness                                                                           | Flu-like             |
| In-hospital                                                                                      | Hospitalized         |
| Initially hospitalized, but now improved and discharged                                          | Released             |
| inknown                                                                                          | Unknown              |
| Inpatient                                                                                        | Hospitalized         |
| inpatient                                                                                        | Hospitalized         |
| Intensive Care                                                                                   | ICU                  |
| Intensive Care Unit                                                                              | ICU                  |
| Isolation                                                                                        | Unknown              |
| J03.9 Acute tonsillitis, unspecified                                                             | Acute infection      |
| J04.1 Acute tracheitis                                                                           | Acute infection      |
| J06.8 Other acute upper respiratory infections of multiple sites                                 | Acute infection      |
| J06.9 Acute upper respiratory infection, unspecified                                             | Acute infection      |
| J12.9 Viral pneumonia, unspecified                                                               | Pneumonia            |
| J18 Bronchopneumonia, unspecified                                                                | Pneumonia            |
| J18.8 Other pneumonia, organism unspecified                                                      | Pneumonia            |

*Predicting COVID-19 Disease Severity from SARS-CoV-2 Spike Protein Sequence by Mixed Effects Machine Learning – B.A. Sokhansanj & G.L. Rosen – Supplementary Table S1*

| <b>Original</b>                                                                    | <b>Map1</b>         |
|------------------------------------------------------------------------------------|---------------------|
| J18.9 Pneumonia, unspecified                                                       | Pneumonia           |
| J22. Unspecified acute lower respiratory infection                                 | Acute infection     |
| Live                                                                               | Alive               |
| Live                                                                               | Alive               |
| live                                                                               | Alive               |
| Live, acute respiratory infection                                                  | Acute infection     |
| Live, ambulatory care                                                              | Ambulatory          |
| Live, asymptomatic                                                                 | Asymptomatic        |
| Live, hospitalized                                                                 | Hospitalized        |
| Live, mild fever and weakness                                                      | Mild                |
| Live, mild symptoms, at home                                                       | Mild                |
| Live, not hospitalized                                                             | Not hospitalized    |
| Live, Not Hospitalized.                                                            | Not hospitalized    |
| Live, physical examination                                                         | Screening           |
| Live, Recovered                                                                    | Recovered           |
| Live, symptomatic                                                                  | Symptomatic         |
| Live.                                                                              | Alive               |
| Live. Ambulatory                                                                   | Ambulatory          |
| Live. Not hospitalized                                                             | Not hospitalized    |
| Lived                                                                              | Alive               |
| lLive                                                                              | Alive               |
| M62.9 Disorder of muscle, unspecified, high temperature                            | Symptomatic         |
| Male                                                                               | Unknown             |
| MILD                                                                               | Mild                |
| Mild                                                                               | Mild                |
| Mild / Contact exposure / Asymptomatic                                             | Asymptomatic / Mild |
| Mild clinical signs                                                                | Mild                |
| Mild clinical signs without hospitalization                                        | Mild                |
| Mild clinical signs without hospitalization. Diarrhoea                             | Mild                |
| Mild clinical signs without hospitalization. Distorted ability to smell            | Mild                |
| Mild clinical signs without hospitalization. Distorted ability to smell and taste  | Mild                |
| Mild clinical signs without hospitalization. Distorted ability to smell and taste. | Mild                |
| Mild clinical signs without hospitalization. Distorted ability to smell.           | Mild                |



*Predicting COVID-19 Disease Severity from SARS-CoV-2 Spike Protein Sequence by Mixed Effects Machine Learning – B.A. Sokhansanj & G.L. Rosen – Supplementary Table S1*

| <b>Original</b>                                                            | <b>Map1</b>                 |
|----------------------------------------------------------------------------|-----------------------------|
| Mild clinical signs without hospitalization.<br>Distorted ability to taste | Mild                        |
| Mild Covid                                                                 | Mild                        |
| Mild disease                                                               | Mild                        |
| Mild disease, full recovery, just rhinorrhea                               | Mild                        |
| Mild disease, persistent infection                                         | Mild                        |
| Mild infection                                                             | Mild                        |
| Mild Symptoms                                                              | Mild                        |
| Mild symptomatology                                                        | Mild                        |
| Mild Symptoms                                                              | Mild                        |
| Mild symptoms (fever, cardiovascular disorders)                            | Mild                        |
| Mild symptoms, not-hospitalized                                            | Mild                        |
| Mild symptomatic case                                                      | Mild                        |
| Mild, at home.                                                             | Mild                        |
| Mild, live                                                                 | Mild                        |
| mild, unhospitalized                                                       | Mild                        |
| Mild/Contact exposure/Asymptomatic                                         | Asymptomatic / Mild         |
| Mild/Live                                                                  | Mild                        |
| Mild/Moderate                                                              | Mild / Moderate             |
| Moderate                                                                   | Moderate                    |
| MODERATE                                                                   | Moderate                    |
| Moderate / Outpatient                                                      | Moderate                    |
| Moderate, Live                                                             | Moderate                    |
| Moderate, live                                                             | Moderate                    |
| Moderate/Severe                                                            | Moderate / Severe           |
| Multidisciplinary ICU                                                      | ICU                         |
| Nanopore                                                                   | Unknown                     |
| Nasal swab                                                                 | Unknown                     |
| Nasal Swab                                                                 | Unknown                     |
| Nasopharyngeal and oropharyngeal swab                                      | Unknown                     |
| Nasopharyngeal and oropharyngeal swabs                                     | Unknown                     |
| Nasopharyngeal swab                                                        | Unknown                     |
| Neurology ward, Hospitalised                                               | Hospitalized                |
| New York                                                                   | Unknown                     |
| NICD outbreak investigation                                                | Unknown                     |
| No clinical signs                                                          | Asymptomatic                |
| No Data                                                                    | Unknown                     |
| No Hospitalized                                                            | Not hospitalized            |
| Non critical hospitalization                                               | Not critically hospitalized |

*Predicting COVID-19 Disease Severity from SARS-CoV-2 Spike Protein Sequence by Mixed Effects Machine Learning – B.A. Sokhansanj & G.L. Rosen – Supplementary Table S1*

| <b>Original</b>                                                         | <b>Map1</b>      |
|-------------------------------------------------------------------------|------------------|
| Non Hospitalized                                                        | Not hospitalized |
| Non hospitalized                                                        | Not hospitalized |
| non hospitalized                                                        | Not hospitalized |
| Non Severe                                                              | Not severe       |
| Non-hospitalized                                                        | Not hospitalized |
| Non-hospitalized, symptoms: cough                                       | Mild             |
| Non-hospitalized, symptoms: sore throat                                 | Mild             |
| Non-hospitalized, symptoms: runny nose                                  | Mild             |
| Not hospitalized                                                        | Not hospitalized |
| Not Hospitalized                                                        | Not hospitalized |
| Not Quarantined                                                         | Unknown          |
| Not vaccinated                                                          | Not vaccinated   |
| not vaccinated                                                          | Not vaccinated   |
| Not Vaccinated                                                          | Not vaccinated   |
| Nursing Home                                                            | Unknown          |
| Nursing home                                                            | Unknown          |
| Nursing house                                                           | Unknown          |
| Obit - Death due to lack of oxygen in the health unit.                  | Dead             |
| Oligosymptomatic                                                        | Mild             |
| Oronpharyngeal swab                                                     | Unknown          |
| Oropharyngeal swab                                                      | Unknown          |
| Oro-pharyngeal swab                                                     | Unknown          |
| Other                                                                   | Unknown          |
| Other acute upper respiratory infections of multiple sites              | Acute infection  |
| Other acute upper respiratory tract infections of multiple localization | Acute infection  |
| Other unidentified viral infections                                     | Unknown          |
| ou                                                                      | Mild             |
| Oupatient                                                               | Not hospitalized |
| Outaptient                                                              | Not hospitalized |
| Outgoing traveler                                                       | Unknown          |
| outpatient                                                              | Not hospitalized |
| Outpatient                                                              | Not hospitalized |
| out-patient                                                             | Not hospitalized |
| Out-patient                                                             | Not hospitalized |
| OUTPATIENT - HOME MONITORING                                            | Home             |
| Outpatient - Home Monitoring                                            | Home             |
| Outpatient mild disease                                                 | Mild             |

*Predicting COVID-19 Disease Severity from SARS-CoV-2 Spike Protein Sequence by Mixed Effects Machine Learning – B.A. Sokhansanj & G.L. Rosen – Supplementary Table S1*

| <b>Original</b>                       | <b>Map1</b>            |
|---------------------------------------|------------------------|
| Outpatient, Mild disease              | Mild                   |
| Outpatient, mild disease              | Mild                   |
| Outre mer                             | Unknown                |
| Overseas inflow                       | Unknown                |
| Paediatric casualty                   | Casualty               |
| Paeds casualty                        | Casualty               |
| Paucisymptomatic                      | Paucisymptomatic       |
| Pauci-Symptomatic                     | Paucisymptomatic       |
| Paucisymptomatyc                      | Paucisymptomatic       |
| Paucisymtomatic                       | Paucisymptomatic       |
| Paucisymtpmatic                       | Paucisymptomatic       |
| Persistent infection                  | Chronic infection      |
| Pneumonia                             | Pneumonia              |
| Pneumonia (chest X-ray)               | Pneumonia              |
| Pneumonia (chest X-ray), not critical | Pneumonia              |
| Pneumonia, unspecified organism       | Pneumonia              |
| Positive                              | Unknown                |
| Post mortem                           | Dead                   |
| Quarantine                            | Unknown                |
| Quarantine isolation                  | Unknown                |
| Quarantine Isolation                  | Unknown                |
| Quarantined                           | Unknown                |
| random surveillance                   | Screening              |
| Random surveillance                   | Screening              |
| Rebased                               | Unknown                |
| Recovered                             | Recovered              |
| RECOVERED                             | Recovered              |
| recovered                             | Recovered              |
| Recovering                            | Recovered              |
| Recovery                              | Recovered              |
| Recovery 2021-04-18                   | Recovered              |
| Referido                              | Unknown                |
| Reinfected                            | Reinfection            |
| Reinfection                           | Reinfection            |
| Re-infection/moderate/live            | Moderate / Reinfection |
| Release                               | Released               |
| Released                              | Released               |
| released                              | Released               |
| Released, Live                        | Released               |
| Respiratory disease                   | Symptomatic            |

*Predicting COVID-19 Disease Severity from SARS-CoV-2 Spike Protein Sequence by Mixed Effects Machine Learning – B.A. Sokhansanj & G.L. Rosen – Supplementary Table S1*

| <b>Original</b>                                                 | <b>Map1</b>           |
|-----------------------------------------------------------------|-----------------------|
| Retesting                                                       | Unknown               |
| Routine                                                         | Screening             |
| Routine general health check-up of other defined subpopulations | Screening             |
| Sance Asymptomatic                                              | Asymptomatic          |
| Screen                                                          | Screening             |
| Screened for travel                                             | Screening             |
| screening                                                       | Screening             |
| SCREENING                                                       | Screening             |
| Screening                                                       | Screening             |
| Serious                                                         | Serious               |
| Sever/hospitalised                                              | Severe / Hospitalized |
| Severa                                                          | Severe                |
| Severe                                                          | Severe                |
| SEVERE                                                          | Severe / Hospitalized |
| Severe (Hospitalized)                                           | Severe / Hospitalized |
| Severe / ICU                                                    | Severe / Hospitalized |
| Severe clinical signs                                           | Severe                |
| Severe infection                                                | Severe                |
| Severe symptoms with underlying asthma and hypertension         | Severe                |
| Severe, hospitalized                                            | Severe                |
| Severe, live                                                    | Severe                |
| Severo                                                          | Severe                |
| Sick                                                            | Symptomatic           |
| sore throat, sweating, T-norm                                   | Mild                  |
| Stable                                                          | Stable                |
| Stable in quarantine                                            | Mild                  |
| Sudden death                                                    | Dead                  |
| Surveillance                                                    | Screening             |
| Suspect                                                         | Unknown               |
| Suspect/SAD/SAD                                                 | Unknown               |
| Suspect/SAD/SAD/SAD                                             | Unknown               |
| Suspected                                                       | Unknown               |
| Suspected Corona                                                | Unknown               |
| Suspected coronavirus infection                                 | Unknown               |
| Suspect-SAD                                                     | Unknown               |
| Symptomatic                                                     | Symptomatic           |
| Symptomatic                                                     | Symptomatic           |
| symptomatic                                                     | Symptomatic           |

*Predicting COVID-19 Disease Severity from SARS-CoV-2 Spike Protein Sequence by Mixed Effects Machine Learning – B.A. Sokhansanj & G.L. Rosen – Supplementary Table S1*

| <b>Original</b>                                                                                                                                                                     | <b>Map1</b>               |
|-------------------------------------------------------------------------------------------------------------------------------------------------------------------------------------|---------------------------|
| Symptomatic - Ambulatory                                                                                                                                                            | Ambulatory                |
| Symptomatic mild disease                                                                                                                                                            | Mild                      |
| Symptomatic ambulatory                                                                                                                                                              | Ambulatory                |
| Symptomatic and Ambulatory                                                                                                                                                          | Ambulatory                |
| Symptomatic and Hospitalized                                                                                                                                                        | Hospitalized              |
| Symptomatic, Outpatient                                                                                                                                                             | Outpatient                |
| Symptomatic/mild illness/Live                                                                                                                                                       | Mild                      |
| Symptomatic/Reinfection                                                                                                                                                             | Symptomatic / Reinfection |
| Symptoms indicative of upper respiratory infection                                                                                                                                  | Symptomatic               |
| Throat                                                                                                                                                                              | Mild                      |
| Trauma                                                                                                                                                                              | Symptomatic               |
| U07.1 Coronavirus infection caused by the COVID-19 virus, the virus has been identified (confirmed by laboratory testing, regardless of the severity of clinical signs or symptoms) | Unknown                   |
| U07.1 COVID-19, virus identified                                                                                                                                                    | Unknown                   |
| U07.2 Coronavirus infection caused by COVID-19 virus, virus not identified                                                                                                          | Unknown                   |
| U07.2 COVID-19, virus not identified                                                                                                                                                | Unknown                   |
| UCI                                                                                                                                                                                 | Unknown                   |
| unknown                                                                                                                                                                             | Unknown                   |
| Umknown                                                                                                                                                                             | Unknown                   |
| Undetlying DM and Ischemic Heart Disease                                                                                                                                            | Unknown                   |
| unknkown                                                                                                                                                                            | Unknown                   |
| unknoww                                                                                                                                                                             | Unknown                   |
| Unknow                                                                                                                                                                              | Unknown                   |
| unknow                                                                                                                                                                              | Unknown                   |
| unknwon                                                                                                                                                                             | Unknown                   |
| unkonown                                                                                                                                                                            | Unknown                   |
| unkonwn                                                                                                                                                                             | Unknown                   |
| Unkown                                                                                                                                                                              | Unknown                   |
| unkown                                                                                                                                                                              | Unknown                   |
| vaccinated                                                                                                                                                                          | Vaccinated                |
| Vaccinated                                                                                                                                                                          | Vaccinated                |
| Vaccinated & Demise                                                                                                                                                                 | Dead / Vaccinated         |
| Vaccine escape/ Live                                                                                                                                                                | Vaccinated                |
| Vaccine escape/Live                                                                                                                                                                 | Vaccinated                |
| Vaccine escape/mild/Live                                                                                                                                                            | Vaccinated / Mild         |
| Voyageur                                                                                                                                                                            | Unknown                   |

*Predicting COVID-19 Disease Severity from SARS-CoV-2 Spike Protein Sequence by Mixed Effects Machine Learning – B.A. Sokhansanj & G.L. Rosen – Supplementary Table S1*

| <b>Original</b>                                                                                      | <b>Map1</b>     |
|------------------------------------------------------------------------------------------------------|-----------------|
| x                                                                                                    | Unknown         |
| Z00 General medical examination                                                                      | Unknown         |
| Z00.0 General medical examination                                                                    | Unknown         |
| Z01 Other special examinations and investigations of persons without complaint or reported diagnosis | Unknown         |
| Z01.7 Laboratory examination                                                                         | Unknown         |
| Z04.9 Examination and observation for unspecified reason                                             | Unknown         |
| Z11.5                                                                                                | Unknown         |
| Z11.5 Special screening examination for other viral diseases                                         | Unknown         |
| Z13.9 Special screening examination, unspecified                                                     | Unknown         |
| Z20.0 Contact with and exposure to intestinal infectious diseases                                    | Screening       |
| Z20.8 Contact with and exposure to other communicable diseases                                       | Screening       |
| Active case                                                                                          | Active          |
| ALIVE                                                                                                | Alive           |
| DEAD                                                                                                 | Dead            |
| Deceased (BID)                                                                                       | Dead            |
| Deceased (Brought in Dead)                                                                           | Dead            |
| Decreased                                                                                            | Dead            |
| Deseased                                                                                             | Dead            |
| Emergency care                                                                                       | Hospitalized    |
| Expired                                                                                              | Dead            |
| Fatal                                                                                                | Dead            |
| Home Isolation                                                                                       | Home            |
| Hospitalised, Reinfection                                                                            | Hospitalized    |
| Hospitalised-live                                                                                    | Hospitalized    |
| Hospitalized / Rawat Inap                                                                            | Hospitalized    |
| Hospitalized -ICU-critical                                                                           | Severe          |
| Hospitalized, Pregnant                                                                               | Hospitalized    |
| In-patient                                                                                           | Hospitalized    |
| J02.9 Acute pharyngitis, unspecified                                                                 | Acute Infection |
| J04.2 Acute laryngotracheitis                                                                        | Acute Infection |
| J06 Acute upper respiratory infections of multiple and unspecified sites                             | Acute Infection |
| J41 Simple chronic bronchitis                                                                        | Acute Infection |

*Predicting COVID-19 Disease Severity from SARS-CoV-2 Spike Protein Sequence by Mixed Effects Machine Learning – B.A. Sokhansanj & G.L. Rosen – Supplementary Table S1*

| <b>Original</b>                                                                                                 | <b>Map1</b>      |
|-----------------------------------------------------------------------------------------------------------------|------------------|
| J81 Pulmonary oedema                                                                                            | Pneumonia        |
| Live / Hidup                                                                                                    | Alive            |
| Mild - not requiring supplementary oxygen                                                                       | Mild             |
| Mild Disease                                                                                                    | Mild             |
| Non-hospitalized                                                                                                | Not hospitalized |
| Nursing-home                                                                                                    | Unknown          |
| Outpatient Care, Alive                                                                                          | Not hospitalized |
| Outpatient-live                                                                                                 | Not hospitalized |
| R05 Cough                                                                                                       | Mild             |
| R06.0 Dyspnoea, Orthopnoea, Shortness of breath                                                                 | Symptomatic      |
| R43.0 Anosmia                                                                                                   | Mild             |
| R50 Fever of other and unknown origin                                                                           | Mild             |
| R50.9 Fever, unspecified                                                                                        | Mild             |
| R51 Headache                                                                                                    | Mild             |
| R53 Malaise and fatigue                                                                                         | Mild             |
| Recover                                                                                                         | Recovered        |
| Released / Lepas Rawat                                                                                          | Released         |
| Severe, Live                                                                                                    | Severe           |
| Symptomatic - Hospitalized                                                                                      | Hospitalized     |
| Symptomatic COVID-19                                                                                            | Symptomatic      |
| Symptoms: fever, general discomfort, headache, cough, rhinorrhea.                                               | Mild             |
| Symptoms: fever, general discomfort, muscle or joint pain, headache, cough, odynophagia, anosmia, rhinorrhea.   | Mild             |
| Symptoms: fever, general discomfort, muscle or joint pain, headache, cough, odynophagia, vomiting and diarrhea. | Mild             |
| Symptoms: fever, general discomfort, muscle or joint pain, headache, rhinorrhea, vomiting or diarrhea.          | Mild             |
| Symptoms: fever, headache, loss of smell.                                                                       | Mild             |
| Symptoms: general discomfort, muscle or joint pain, headache, cough, odynophagia, rhinorrhea.                   | Mild             |
| UNK                                                                                                             | Unknown          |
| Vaccine escape                                                                                                  | Vaccinated       |
| Very Severe                                                                                                     | Severe           |
| Admitted to ER                                                                                                  | Hospitalized     |

*Predicting COVID-19 Disease Severity from SARS-CoV-2 Spike Protein Sequence by Mixed Effects Machine Learning – B.A. Sokhansanj & G.L. Rosen – Supplementary Table S1*

| <b>Original</b>                                                                                 | <b>Map1</b>      |
|-------------------------------------------------------------------------------------------------|------------------|
| alive/not hospitalized                                                                          | Not hospitalized |
| Criticalli III with SLE Encephalitis                                                            | Unknown          |
| Deceased (brought in dead)                                                                      | Dead             |
| Deceased (in-hospital death)                                                                    | Dead             |
| Deceased (In-Hospital Death)                                                                    | Dead             |
| Discharged alive                                                                                | Released         |
| Hospitalizim                                                                                    | Hospitalized     |
| Incarcerated                                                                                    | Unknown          |
| J12.8 Other viral pneumonia                                                                     | Pneumonia        |
| live hospitalized                                                                               | Hospitalized     |
| Live non hospitalized                                                                           | Not hospitalized |
| live non hospitalized                                                                           | Not hospitalized |
| live, outpatient                                                                                | Not hospitalized |
| mild                                                                                            | Mild             |
| Mild COVID                                                                                      | Mild             |
| Out patient                                                                                     | Not hospitalized |
| outpatient , Live                                                                               | Not hospitalized |
| Outpatients                                                                                     | Not hospitalized |
| Released then hospitalized. Improved                                                            | Released         |
| Sever                                                                                           | Severe           |
| severe                                                                                          | Severe           |
| Transfer to other facility                                                                      | Hospitalized     |
| U07.1 COVID-19                                                                                  | Symptomatic      |
| U07.2 COVID-19                                                                                  | Symptomatic      |
| Z00.0 General examination and investigation of persons without complaint and reported diagnosis | Asymptomatic     |
| -                                                                                               | Unknown          |
| ,                                                                                               | Unknown          |
| 0.0                                                                                             | Unknown          |
| 1.0                                                                                             | Unknown          |
| 10.0                                                                                            | Unknown          |
| 11.0                                                                                            | Unknown          |
| 12.0                                                                                            | Unknown          |
| 13.0                                                                                            | Unknown          |
| 14.0                                                                                            | Unknown          |
| 15.0                                                                                            | Unknown          |
| 16.0                                                                                            | Unknown          |
| 17.0                                                                                            | Unknown          |
| 18.0                                                                                            | Unknown          |



*Predicting COVID-19 Disease Severity from SARS-CoV-2 Spike Protein Sequence by Mixed Effects Machine Learning – B.A. Sokhansanj & G.L. Rosen – Supplementary Table S1*

| <b>Original</b> | <b>Map1</b> |
|-----------------|-------------|
| 19.0            | Unknown     |
| 2.0             | Unknown     |
| 20 - 29         | Unknown     |
| 20.0            | Unknown     |
| 21.0            | Unknown     |
| 22.0            | Unknown     |
| 23.0            | Unknown     |
| 24.0            | Unknown     |
| 25.0            | Unknown     |
| 26.0            | Unknown     |
| 27.0            | Unknown     |
| 28.0            | Unknown     |
| 29.0            | Unknown     |
| 3.0             | Unknown     |
| 30.0            | Unknown     |
| 31.0            | Unknown     |
| 32.0            | Unknown     |
| 33.0            | Unknown     |
| 34.0            | Unknown     |
| 35.0            | Unknown     |
| 36.0            | Unknown     |
| 37.0            | Unknown     |
| 38.0            | Unknown     |
| 39.0            | Unknown     |
| 4.0             | Unknown     |
| 40.0            | Unknown     |
| 41.0            | Unknown     |
| 42.0            | Unknown     |
| 43.0            | Unknown     |
| 44.0            | Unknown     |
| 45.0            | Unknown     |
| 46.0            | Unknown     |
| 47.0            | Unknown     |
| 48.0            | Unknown     |
| 49.0            | Unknown     |
| 5.0             | Unknown     |
| 50.0            | Unknown     |
| 51.0            | Unknown     |
| 52.0            | Unknown     |
| 53.0            | Unknown     |

*Predicting COVID-19 Disease Severity from SARS-CoV-2 Spike Protein Sequence by Mixed Effects Machine Learning – B.A. Sokhansanj & G.L. Rosen – Supplementary Table S1*

| <b>Original</b>                            | <b>Map1</b>  |
|--------------------------------------------|--------------|
| 54.0                                       | Unknown      |
| 55.0                                       | Unknown      |
| 56.0                                       | Unknown      |
| 57.0                                       | Unknown      |
| 58.0                                       | Unknown      |
| 59.0                                       | Unknown      |
| 6.0                                        | Unknown      |
| 60.0                                       | Unknown      |
| 62.0                                       | Unknown      |
| 63.0                                       | Unknown      |
| 64.0                                       | Unknown      |
| 65.0                                       | Unknown      |
| 66.0                                       | Unknown      |
| 67.0                                       | Unknown      |
| 68.0                                       | Unknown      |
| 69.0                                       | Unknown      |
| 7.0                                        | Unknown      |
| 72.0                                       | Unknown      |
| 73.0                                       | Unknown      |
| 74.0                                       | Unknown      |
| 75.0                                       | Unknown      |
| 76.0                                       | Unknown      |
| 78.0                                       | Unknown      |
| 82.0                                       | Unknown      |
| 83.0                                       | Unknown      |
| 84.0                                       | Unknown      |
| 85.0                                       | Unknown      |
| 86.0                                       | Unknown      |
| 87.0                                       | Unknown      |
| 92.0                                       | Unknown      |
| 94.0                                       | Unknown      |
| Accident And Emergency                     | Unknown      |
| ACCIDENT AND EMERGENCY                     | Unknown      |
| Admitted to Emergency Room                 | Hospitalized |
| Admitted to the Emergency Room             | Hospitalized |
| Admitted                                   | Hospitalized |
| Admitted for splenectomy, fever for 3 days | Hospitalized |
| Admitted to the ER                         | Hospitalized |
| Aftercare                                  | Symptomatic  |
| alive, hospitalized                        | Hospitalized |

*Predicting COVID-19 Disease Severity from SARS-CoV-2 Spike Protein Sequence by Mixed Effects Machine Learning – B.A. Sokhansanj & G.L. Rosen – Supplementary Table S1*

| <b>Original</b>                                          | <b>Map1</b>      |
|----------------------------------------------------------|------------------|
| Alive, hospitalized                                      | Hospitalized     |
| Alive, not hospitalized                                  | Not hospitalized |
| alive, not hospitalized                                  | Not hospitalized |
| Allmn vervakning                                         | Unknown          |
| AMBULATORIO - EN TRATAMIENTO                             | Ambulatory       |
| AMBULATORIO - SEGUIMIENTO DOMICILIARIO                   | Ambulatory       |
| AMBULATORIO - SEGUIMIENTO TERMINADO                      | Ambulatory       |
| Ambulatory - under treatment                             | Ambulatory       |
| Asintomatico                                             | Asymptomatic     |
| Aspirado                                                 | Severe           |
| Asymptomatic - Hospitalized                              | Asymptomatic     |
| Asymptomatic, exposure +ve                               | Asymptomatic     |
| Asymptomtic                                              | Asymptomatic     |
| ASYMTOMATIC                                              | Asymptomatic     |
| BID                                                      | Unknown          |
| CAS4 MAIN CASUALTY                                       | Unknown          |
| Case follow-up                                           | Unknown          |
| CASUALTY                                                 | Unknown          |
| Casualty Main Casualty                                   | Unknown          |
| CBC, FER, DID, LDH normal                                | Unknown          |
| CBC, FER, DID, LDH normal, CRP mildly raised             | Unknown          |
| CBC, FER, DID, LDH normal, CRP mildly raised, CXR normal | Unknown          |
| CBC, FER, DID, LDH not too bad                           | Unknown          |
| cmjah                                                    | Unknown          |
| Cold                                                     | Mild             |
| Community Screen And Test                                | Screening        |
| Community surveillance                                   | Screening        |
| Community surveillance halfway house                     | Screening        |
| Confirm SAD                                              | Unknown          |
| Contact Case                                             | Screening        |
| Control                                                  | Screening        |
| cough cold                                               | Mild             |
| cough, cold, SOB                                         | Moderate         |
| Critically ill                                           | Severe           |
| CXR, CBC, FER, DID, LDH, managed in Outpatient           | Mild             |
| Dead Body                                                | Dead             |
| death                                                    | Dead             |
| DECEASED                                                 | Dead             |

*Predicting COVID-19 Disease Severity from SARS-CoV-2 Spike Protein Sequence by Mixed Effects Machine Learning – B.A. Sokhansanj & G.L. Rosen – Supplementary Table S1*

| <b>Original</b>                    | <b>Map1</b>             |
|------------------------------------|-------------------------|
| Deceased (brought in death)        | Dead                    |
| Deceased (brought-in dead)         | Dead                    |
| Deceased (brought-in death)        | Dead                    |
| Deceased postmortem                | Dead                    |
| Deceased, severe, Hospitalized     | Dead                    |
| Deceased(brought in dead)          | Dead                    |
| Decesead                           | Dead                    |
| Diagnosed                          | Dead                    |
| Discharge                          | Released                |
| EN TRATAMIENTO                     | Symptomatic             |
| Fallecido                          | Dead                    |
| FAMILY MEDICINE CLINIC             | Mild                    |
| fever                              | Mild                    |
| Fever and Headache                 | Mild                    |
| fever, cold                        | Mild                    |
| Fever, cough                       | Mild                    |
| fever, cough cold sore throat      | Mild                    |
| fever, cough cold sore throat,     | Mild                    |
| fever, cough cold sore throat, SOB | Moderate                |
| fever, cough sore throat, mild     | Mild                    |
| Fever, cough, 3 days               | Mild                    |
| fever, cough, cold                 | Mild                    |
| fever, runny nose                  | Mild                    |
| fever, sore throat                 | Mild                    |
| First Contact                      | Unknown                 |
| Hisopado                           | Unknown                 |
| Home isolated                      | Mild                    |
| Home Isolated                      | Mild                    |
| Home isolation                     | Mild                    |
| hospitalised                       | Hospitalized            |
| Hospitalised - serious case        | Serious                 |
| HOSPITALIZADO - CASO GRAVE -       | Serious                 |
| HOSPITALIZADO - CASO NO GRAVE      | Hospitalized / Moderate |
| Hospitalization                    | Hospitalized            |
| HOSPITALIZED                       | Hospitalized            |
| Hospitalized - death               | Dead                    |
| Hospitalized - high improvement    | Hospitalized            |
| Hospitalized - non-serious case    | Hospitalized / Moderate |
| Hospitalized - under treatment     | Hospitalized            |
| Hospitalized- serious case         | Hospitalized            |

*Predicting COVID-19 Disease Severity from SARS-CoV-2 Spike Protein Sequence by Mixed Effects Machine Learning – B.A. Sokhansanj & G.L. Rosen – Supplementary Table S1*

| <b>Original</b>                                                                         | <b>Map1</b>           |
|-----------------------------------------------------------------------------------------|-----------------------|
| Hospitalized, Release                                                                   | Released              |
| Hospitalized, Released                                                                  | Released              |
| Hospitalized, severe                                                                    | Severe                |
| hospitalized                                                                            | Hospitalized          |
| Hotel isolation                                                                         | Mild                  |
| hunter-harvested                                                                        | Unknown               |
| Imported                                                                                | Unknown               |
| In isolation                                                                            | Unknown               |
| In patient Labour ward                                                                  | Unknown               |
| In patient Peadiatric Surgery                                                           | Unknown               |
| In-patient ARV Clinic                                                                   | Unknown               |
| In-patient Cardiology                                                                   | Unknown               |
| In-patient chronic dialysis                                                             | Unknown               |
| In-patient ENT                                                                          | Unknown               |
| In-patient general surgery                                                              | Unknown               |
| In-patient Labour                                                                       | Unknown               |
| In-patient Neurology                                                                    | Unknown               |
| In-patient Nuclear Medicine Renal                                                       | Unknown               |
| In-patient Oncology                                                                     | Unknown               |
| In-patient Peadiatric Medical                                                           | Unknown               |
| In-patient Peadiatric Renal                                                             | Unknown               |
| In-patient Peadiatric Surgical                                                          | Unknown               |
| In-patient Urology                                                                      | Unknown               |
| In-patint ENT                                                                           | Unknown               |
| increased CRP, other labs are normal                                                    | Mild                  |
| inpatient ,stable                                                                       | Hospitalized / Stable |
| INT                                                                                     | Unknown               |
| J00 Acute nasopharyngitis                                                               | Mild                  |
| J00 Acute nasopharyngitis Z03.8 Observation for other suspected diseases and conditions | Mild                  |
| J12 Viral pneumonia, unspecified                                                        | Pneumonia             |
| J18.1 Lobar pneumonia, unspecified                                                      | Pneumonia             |
| J20.9 Acute bronchitis, unspecified                                                     | Bronchitis            |
| J30 Vasomotor rhinitis                                                                  | Mild                  |
| J30.0 Vasomotor rhinitis                                                                | Mild                  |
| Leve                                                                                    | Alive                 |
| LIVE                                                                                    | Alive                 |
| Live - Intensive Care Unit                                                              | Severe                |
| Live, Mild                                                                              | Mild                  |
| Live, recovered                                                                         | Recovered             |

*Predicting COVID-19 Disease Severity from SARS-CoV-2 Spike Protein Sequence by Mixed Effects Machine Learning – B.A. Sokhansanj & G.L. Rosen – Supplementary Table S1*

| <b>Original</b>                                                                                    | <b>Map1</b>       |
|----------------------------------------------------------------------------------------------------|-------------------|
| Local                                                                                              | Unknown           |
| M42 .1 Adult osteochondrosis of spine                                                              | Unknown           |
| Medical Casualty                                                                                   | Unknown           |
| Mild cold symptoms                                                                                 | Mild              |
| Mild cough                                                                                         | Mild              |
| MILD COVID                                                                                         | Mild              |
| Mild covid                                                                                         | Mild              |
| MILD DISEASE                                                                                       | Mild              |
| Mild fever and cough                                                                               | Mild              |
| Mild fever and cough, SOB 3 days                                                                   | Moderate          |
| Mild illness                                                                                       | Mild              |
| mild symptomatic                                                                                   | Mild              |
| mild symptoms                                                                                      | Mild              |
| Mild symptoms                                                                                      | Mild              |
| Mild symptoms (fever, cough)                                                                       | Mild              |
| Mild symptoms (fever, sore throat)                                                                 | Mild              |
| Mild symptoms fever, cough, sore throat, anosmia                                                   | Mild              |
| Mild symptoms, fever, cough                                                                        | Mild              |
| Mild symptoms, fever, cough, sore throat                                                           | Mild              |
| Missing                                                                                            | Unknown           |
| Moderate covid                                                                                     | Moderate          |
| Moderate COVID                                                                                     | Moderate          |
| MODERATE COVID                                                                                     | Moderate          |
| MODERATE DISEASE                                                                                   | Moderate          |
| Moderate Disease                                                                                   | Moderate          |
| MODERATE DISESE                                                                                    | Moderate          |
| moderate symptomatic, hospitalized with oxygen did not require ICU, improvement and then discharge | Moderate / Severe |
| Moderate to Severe                                                                                 | Moderate / Severe |
| MODERTE DISEASE                                                                                    | Moderate          |
| Nasal congestion, cold, dry cough                                                                  | Mild              |
| Nasopharyngeal Swab                                                                                | Unknown           |
| Nasopharyngeal and Oropharyngeal Swabs                                                             | Unknown           |
| Nasopharyngeal swab and Oropharyngeal swab                                                         | Unknown           |
| Nasopharyngeal Swabs                                                                               | Unknown           |
| No signs and symptoms                                                                              | Asymptomatic      |
| non Hospitalized                                                                                   | Not hospitalized  |

*Predicting COVID-19 Disease Severity from SARS-CoV-2 Spike Protein Sequence by Mixed Effects Machine Learning – B.A. Sokhansanj & G.L. Rosen – Supplementary Table S1*

| <b>Original</b>                                       | <b>Map1</b>                    |
|-------------------------------------------------------|--------------------------------|
| non-hospitalized                                      | Not hospitalized               |
| Normal biomarkers                                     | Mild                           |
| NOT STATED                                            | Unknown                        |
| Nurse-house                                           | Unknown                        |
| OPD patient                                           | Not hospitalized               |
| OUT PATIENT DEPARTMENT                                | Not hospitalized               |
| Out-patient ARV clinic                                | Not hospitalized               |
| Out-patient ARV Clinic                                | Not hospitalized               |
| Out-patient Medical                                   | Not hospitalized               |
| Out-patient Staff                                     | Not hospitalized               |
| Out-patient Staff clinic                              | Not hospitalized               |
| Outpatient - death                                    | Not hospitalized               |
| Outpatient - follow-up completed                      | Not hospitalized               |
| Outpatient - Follow-up completed                      | Not hospitalized               |
| Outpatient - home monitoring                          | Not hospitalized               |
| outpatient / mild                                     | Not hospitalized               |
| outpatient care                                       | Not hospitalized               |
| outpatient, stable                                    | Not hospitalized               |
| paucisymptomatic                                      | Paucisymptomatic               |
| Pregnant 17 weeks+ 6 days                             | Unknown                        |
| Pregnant 26 weeks                                     | Unknown                        |
| Pregnant, lymphocytosis on CBC                        | Unknown                        |
| Probable Case                                         | Unknown                        |
| Quarantine facility                                   | Unknown                        |
| quarantined                                           | Unknown                        |
| R50 Fever, unspecified                                | Mild                           |
| Received first dose of vaccine Astrazeneca 31/03/2021 | Vaccinated                     |
| Reinfection, Mild disease                             | Mild / Reinfection             |
| Reinfection, Paucisymptomatic                         | Paucisymptomatic / Reinfection |
| Runny nose                                            | Mild                           |
| SEGUIMIENTO DOMICILIARIO                              | Unknown                        |
| Severe case                                           | Severe                         |
| SEVERE COVID                                          | Severe                         |
| Severe covid                                          | Severe                         |
| Severe COVID pneumonia in ICU                         | Severe                         |
| severe COVID pneumonia, recovered                     | Severe                         |
| SEVERE DISEASE                                        | Severe                         |
| Severe Disease                                        | Severe                         |

*Predicting COVID-19 Disease Severity from SARS-CoV-2 Spike Protein Sequence by Mixed Effects Machine Learning – B.A. Sokhansanj & G.L. Rosen – Supplementary Table S1*

| <b>Original</b>                                                                                       | <b>Map1</b>  |
|-------------------------------------------------------------------------------------------------------|--------------|
| severe symptomatic, required ICU, improvement after discharge                                         | Severe       |
| Severe, deceased                                                                                      | Severe       |
| Severe, Hospitalized                                                                                  | Severe       |
| Sintomatico                                                                                           | Symptomatic  |
| Stayed at an accommodation facility, Released                                                         | Mild         |
| Stayed at home, Released                                                                              | Mild         |
| Survived                                                                                              | Alive        |
| Suspected Case                                                                                        | Symptomatic  |
| Symptomatic (mild)                                                                                    | Mild         |
| Symptomatic mildly for 2 days                                                                         | Mild         |
| Symptomatic Throat                                                                                    | Mild         |
| Symptomatic, fever                                                                                    | Mild         |
| Travel                                                                                                | Unknown      |
| U07.2 COVID virus not identified                                                                      | Unknown      |
| U07.2 COVID-19, virus not identified J06.8 Other acute upper respiratory infections of multiple sites | Unknown      |
| unkmown                                                                                               | Unknown      |
| unknwn                                                                                                | Unknown      |
| Vaccinated-1 dose-Astrazeneca                                                                         | Vaccinated   |
| Vaccinated-2 dose-Astrazeneca                                                                         | Vaccinated   |
| Vaccinated-2 dose-Pfizer                                                                              | Vaccinated   |
| Vaccinationsgenombrott                                                                                | Vaccinated   |
| Voyageur Sortant                                                                                      | Unknown      |
| WARD 3 PAEDIATRIC                                                                                     | Unknown      |
| z.008 Other general examinations                                                                      | Unknown      |
| Z00.0 General Medical Examination                                                                     | Unknown      |
| Z00.8 Other general examinations                                                                      | Unknown      |
| Z03.8 Observation for other suspected diseases and conditions                                         | Unknown      |
| Ano                                                                                                   | Unknown      |
| Assymptomatic                                                                                         | Asymptomatic |
| asymtomatic                                                                                           | Asymptomatic |
| Brought In Dead                                                                                       | Dead         |
| Con cardiopatia.                                                                                      | Symptomatic  |
| deceased 20/8                                                                                         | Dead         |
| deceased 14/8                                                                                         | Dead         |
| Home treatment                                                                                        | Mild         |
| Hospitalizado                                                                                         | Hospitalized |



*Predicting COVID-19 Disease Severity from SARS-CoV-2 Spike Protein Sequence by Mixed Effects Machine Learning – B.A. Sokhansanj & G.L. Rosen – Supplementary Table S1*

| <b>Original</b>                                                            | <b>Map1</b>      |
|----------------------------------------------------------------------------|------------------|
| Hospitalized ICU                                                           | Severe           |
| Hospitalized severe                                                        | Severe           |
| Hospitalized-severe                                                        | Severe           |
| Hospitalized,hospital transfer                                             | Hospitalized     |
| In-patient cardiac                                                         | Unknown          |
| In-patient Cardio                                                          | Unknown          |
| In-patient labour                                                          | Unknown          |
| In-patient neurology                                                       | Unknown          |
| In-patient paediatric                                                      | Unknown          |
| In-patient paediatrics renal                                               | Unknown          |
| In-patient peritoneal dialysis                                             | Unknown          |
| In-patient staff                                                           | Unknown          |
| In-patient surgery                                                         | Unknown          |
| In-patient surgical                                                        | Unknown          |
| Incoming Traveler                                                          | Unknown          |
| J06.9 Acute upper respiratory infections of multiple and unspecified sites | Acute infection  |
| Manipur                                                                    | Unknown          |
| Mild disease                                                               | Mild             |
| NO                                                                         | Unknown          |
| No                                                                         | Unknown          |
| Not Collected                                                              | Unknown          |
| Out-patient casualty                                                       | Not hospitalized |
| Out-patient ophthalmology                                                  | Not hospitalized |
| Outgoing Traveler                                                          | Unknown          |
| referred to another hospital                                               | Hospitalized     |
| Self Isolation                                                             | Screening        |
| symptomatic                                                                | Symptomatic      |
| symptomatic. Diabetes                                                      | Symptomatic      |
| U07.1 COVID-19 , virus identified                                          | Unknown          |
| U07.2 COVID-19 virus not identified                                        | Unknown          |
| Voyageur Entrant                                                           | Unknown          |
| Yes                                                                        | Unknown          |
