# Supplementary material
Source: PubMed Central journal article supplement (PMC9384346)
Supplement: mmc2.pdf [file mmc2.pdf]

**Supplementary Table S2.**

**Disease severity classifications based on GISAID metadata entries.** Metadata entries are translated to a Status, following the mapping in Supplementary Table S1, and then assigned to Category, which is in turn classified as Mild, Severe, or Unknown.

| Category     | Status (Based on Table S1)                                                                                                                                                                    | Classification |
|--------------|-----------------------------------------------------------------------------------------------------------------------------------------------------------------------------------------------|----------------|
| Alive        | Alive                                                                                                                                                                                         | Unknown        |
| Asymptomatic | Asymptomatic, Asymptomatic / Hospitalized, Asymptomatic / Mild, Asymptomatic/Mild, Paucisymptomatic, Paucisymptomatic / Reinfection                                                           | Mild           |
| Dead         | Dead, Dead / Vaccinated                                                                                                                                                                       | Severe         |
| Hospitalized | Hospitalized, Hospitalized / Stable, Hospitalized / Symptomatic                                                                                                                               | Severe         |
| Mild         | Ambulatory, Ambulatory / Under treatment, Home, Hospitalized / Mild, House Assistance, Mild, Mild / Reinfection, Mild / Moderate, Not hospitalized, Not severe, Outpatient, Vaccinated / Mild | Mild           |
| Moderate     | Hospitalized / Moderate, Hospitalized / Not Serious, Moderate, Moderate / Reinfection, Moderate / Severe, Not critically hospitalized, Pneumonia                                              | Mild           |
| Released     | Released                                                                                                                                                                                      | Severe         |
| Screening    | Screening                                                                                                                                                                                     | Mild           |
| Symptomatic  | Acute infection, Bronchitis, Chronic infection, Flu-like, Stable, Symptomatic, Symptomatic / Reinfection                                                                                      | Unknown        |
| Severe       | Casualty, Critical, Hospitalized / Serious, Hospitalized / Serious, ICU, Serious, Severe, Severe / Hospitalized                                                                               | Severe         |
| Unknown      | Active, Not vaccinated, Recovered, Reinfection, Unknown, Unknown / Vaccinated, Vaccinated                                                                                                     | Unknown        |
