# Supplementary material
Source: PubMed Central journal article supplement (PMC9384346)
Supplement: mmc3.pdf [file mmc3.pdf]

**Supplementary Table S3.**

**Lineage counts for the training data set of samples collected from July 17 through December 25, 2021 used in this paper.** The lineages are taken from GISAID metadata entries, which are based on Pango lineage assignments. (See O’Toole, Á., Scher, E., Underwood, A., Jackson, B., *et al.*, 2021. Assignment of epidemiological lineages in an emerging pandemic using the pangolin tool. *Virus evolution* 7, veab064. <https://doi.org/10.1093/ve/veab064>.)

| Lineage   | Count |
|-----------|-------|
| B.1.617.2 | 8580  |
| AY.43     | 7171  |
| AY.122    | 5299  |
| AY.20     | 4856  |
| AY.4      | 4430  |
| AY.26     | 2158  |
| BA.1      | 1816  |
| AY.100    | 1701  |
| AY.3      | 1141  |
| AY.98.1   | 1041  |
| BA.1.1    | 971   |
| None      | 920   |
| AY.113    | 734   |
| AY.5      | 692   |
| AY.34     | 669   |
| AY.9.2    | 643   |
| AY.25.1   | 585   |
| AY.103    | 567   |
| B         | 560   |
| AY.125    | 546   |
| AY.33     | 500   |
| B.1.621   | 459   |
| AY.46.6   | 458   |
| AY.34.2   | 429   |
| P.1       | 394   |
| AY.126    | 385   |
| B.1.1.7   | 375   |
| AY.9      | 372   |
| AY.112    | 366   |
| AY.23     | 354   |
| AY.12     | 335   |
| AY.42     | 331   |
| AY.99.2   | 328   |

| Lineage   | Count |
|-----------|-------|
| AY.43.3   | 321   |
| AY.57     | 317   |
| AY.44     | 312   |
| AY.127    | 309   |
| AY.102    | 308   |
| AY.4.2    | 305   |
| AY.25     | 298   |
| B.1.640.1 | 294   |
| BA.1.18   | 281   |
| AY.95     | 270   |
| AY.123    | 265   |
| AY.34.1   | 253   |
| AY.101    | 250   |
| AY.121    | 248   |
| AY.24.1   | 236   |
| AY.109    | 207   |
| AY.39     | 197   |
| AY.59     | 197   |
| AY.4.2.3  | 195   |
| AY.5.4    | 188   |
| AY.36     | 187   |
| BA.1.4    | 182   |
| AY.29     | 164   |
| C.37      | 164   |
| AY.129    | 162   |
| AY.124    | 156   |
| AY.92     | 152   |
| BA.1.1.1  | 143   |
| AY.120    | 130   |
| AY.4.9    | 115   |
| AY.28     | 111   |
| AY.104    | 97    |
| AY.24     | 91    |

| Lineage   | Count |
|-----------|-------|
| BA.1.17   | 81    |
| AY.46     | 76    |
| AY.118    | 71    |
| AY.122.4  | 68    |
| AY.4.6    | 68    |
| AY.98     | 65    |
| AY.4.2.2  | 65    |
| AY.7.2    | 63    |
| BA.1.17.2 | 61    |
| AY.94     | 60    |
| AY.6      | 58    |
| AY.4.4    | 58    |
| AY.16     | 55    |
| AY.79     | 53    |
| AY.45     | 52    |
| AY.119    | 52    |
| AY.40     | 52    |
| AY.76     | 50    |
| AY.62     | 49    |
| AY.133    | 48    |
| AY.75     | 47    |
| AY.37     | 47    |
| AY.119.2  | 46    |
| AY.13     | 46    |
| AY.47     | 45    |
| P.1.7     | 44    |
| P.1.15    | 44    |
| AY.116    | 43    |
| AY.86     | 43    |
| BA.1.14   | 42    |
| AY.7.1    | 41    |
| AY.123.1  | 41    |
| AY.54     | 38    |

*Predicting COVID-19 Disease Severity from SARS-CoV-2 Spike Protein Sequence by Mixed Effects Machine Learning – B.A. Sokhansanj & G.L. Rosen – Supplementary Table S3*

| Lineage   | Count |
|-----------|-------|
| AY.106    | 38    |
| B.1.351   | 36    |
| A.2.5     | 36    |
| AY.73     | 34    |
| AY.43.6   | 34    |
| AY.61     | 34    |
| B.1.628   | 34    |
| AY.30     | 33    |
| BA.1.13   | 33    |
| B.1       | 32    |
| AY.3.2    | 30    |
| AY.105    | 29    |
| AY.4.5    | 29    |
| BA.1.1.7  | 29    |
| AY.124.1  | 29    |
| AY.88     | 29    |
| AY.46.2   | 29    |
| AY.85     | 28    |
| AY.128    | 28    |
| AY.117    | 28    |
| AY.72     | 25    |
| AY.4.11   | 24    |
| AY.32     | 24    |
| P.1.2     | 23    |
| AY.84     | 22    |
| AY.27     | 22    |
| BA.1.16   | 22    |
| BA.1.15   | 22    |
| AY.91     | 21    |
| AY.114    | 20    |
| AY.51     | 20    |
| B.1.621.1 | 19    |
| AY.111    | 19    |
| AY.110    | 19    |
| AY.70     | 18    |
| A.2.5.2   | 18    |
| AY.14     | 17    |
| B.1.1.519 | 16    |
| AY.43.4   | 16    |
| AY.4.2.1  | 16    |

| Lineage   | Count |
|-----------|-------|
| AY.71     | 16    |
| AY.39.2   | 15    |
| AY.39.1   | 15    |
| AY.5.2    | 15    |
| B.1.1.318 | 15    |
| B.1.632   | 14    |
| AY.122.2  | 14    |
| AY.29.1   | 14    |
| AY.119.1  | 14    |
| AY.60     | 13    |
| AY.68     | 13    |
| AY.4.3    | 13    |
| AY.121.1  | 13    |
| AY.10     | 13    |
| P.1.12    | 13    |
| AY.19     | 12    |
| AY.33.1   | 12    |
| AY.17     | 12    |
| AY.15     | 12    |
| P.1.9     | 12    |
| AY.43.8   | 12    |
| B.1.1     | 12    |
| AY.3.1    | 11    |
| AY.4.1    | 11    |
| AY.87     | 10    |
| AY.78     | 10    |
| AY.25.3   | 10    |
| B.1.631   | 10    |
| P.1.8     | 9     |
| BA.1.8    | 9     |
| P.1.14    | 9     |
| AY.53     | 9     |
| AY.3.3    | 9     |
| B.1.1.348 | 9     |
| AY.1      | 9     |
| AY.122.1  | 9     |
| AY.77     | 9     |
| AY.7      | 9     |
| BA.1.19   | 8     |
| AY.4.2.4  | 8     |

| Lineage   | Count |
|-----------|-------|
| AY.65     | 8     |
| AY.43.7   | 8     |
| P.1.17    | 8     |
| AY.58     | 7     |
| AY.4.8    | 7     |
| AY.16.1   | 7     |
| AY.107    | 7     |
| AY.66     | 7     |
| AY.22     | 6     |
| AY.125.1  | 6     |
| AY.5.5    | 6     |
| AY.120.2  | 5     |
| AY.75.2   | 5     |
| B.1.621.2 | 5     |
| B.1.575   | 5     |
| BA.1.1.4  | 5     |
| B.1.640.2 | 5     |
| AY.46.4   | 5     |
| AY.35     | 5     |
| C.36.3    | 5     |
| AY.21     | 5     |
| AY.99     | 5     |
| AY.108    | 5     |
| BA.2      | 5     |
| B.1.609   | 5     |
| AY.11     | 5     |
| B.1.351.2 | 5     |
| AY.2      | 5     |
| B.1.177   | 4     |
| AY.48     | 4     |
| AY.127.1  | 4     |
| AY.67     | 4     |
| XB        | 4     |
| BA.1.15.1 | 4     |
| AY.83     | 4     |
| AY.23.1   | 4     |
| P.3       | 4     |
| AY.82     | 4     |
| BA.1.1.11 | 4     |
| AY.120.1  | 4     |

*Predicting COVID-19 Disease Severity from SARS-CoV-2 Spike Protein Sequence by Mixed Effects Machine Learning – B.A. Sokhansanj & G.L. Rosen – Supplementary Table S3*

| Lineage    | Count |
|------------|-------|
| B.1.626    | 4     |
| P.1.7.1    | 4     |
| AY.56      | 4     |
| AY.43.2    | 4     |
| AY.34.1.1  | 4     |
| AZ.5       | 4     |
| AY.43.5    | 4     |
| AY.25.2    | 3     |
| AY.5.3     | 3     |
| BA.3       | 3     |
| B.1.160    | 3     |
| AY.46.5    | 3     |
| P.1.10     | 3     |
| Unassigned | 3     |
| BA.1.1.2   | 3     |
| AY.74      | 3     |
| P.2        | 3     |
| AY.4.7     | 3     |
| AY.38      | 3     |
| P.1.3      | 3     |
| AY.41      | 3     |
| AY.116.1   | 2     |
| AY.46.1    | 2     |
| B.1.620    | 2     |
| B.1.1.523  | 2     |
| P.1.1      | 2     |
| A.1        | 2     |
| B.1.160.25 | 2     |
| Q.8        | 2     |
| AY.64      | 2     |
| AY.39.1.1  | 2     |
| AY.36.1    | 2     |
| B.1.351.5  | 2     |
| B.1.243    | 2     |
| B.1.462    | 2     |
| P.1.4      | 2     |
| B.1.243.2  | 2     |
| AY.120.2.1 | 2     |
| AZ.2       | 2     |
| AY.50      | 2     |

| Lineage   | Count |
|-----------|-------|
| B.1.36    | 2     |
| AY.69     | 2     |
| BA.1.1.15 | 2     |
| B.1.1.207 | 2     |
| C.37.1    | 2     |
| P.1.12.1  | 1     |
| AY.90     | 1     |
| B.1.638   | 1     |
| AY.63     | 1     |
| C.36      | 1     |
| C.26      | 1     |
| A.2.5.1   | 1     |
| AY.102.2  | 1     |
| AY.103.1  | 1     |
| B.1.36.16 | 1     |
| BA.2.9    | 1     |
| AY.39.1.3 | 1     |
| AY.127.2  | 1     |
| Q.4       | 1     |
| BA.1.10   | 1     |
| B.1.551   | 1     |
| AY.99.1   | 1     |
| B.1.411   | 1     |
| AY.103.2  | 1     |
| B.1.1.263 | 1     |
| B.1.427   | 1     |
| AY.20.1   | 1     |
| P.1.6     | 1     |
| B.1.625   | 1     |
| B.1.526   | 1     |
| B.1.637   | 1     |
| P.1.11    | 1     |
| AY.4.14   | 1     |
| B.1.533   | 1     |
| B.1.525   | 1     |
| B.1.429   | 1     |
| AY.52     | 1     |
| B.1.1.317 | 1     |
| B.1.1.525 | 1     |
| C.40      | 1     |

| Lineage   | Count |
|-----------|-------|
| Q.1       | 1     |
| AY.5.1    | 1     |
| B.1.1.117 | 1     |
| AY.93     | 1     |
| B.1.1.1   | 1     |
| B.1.1.241 | 1     |
| B.1.630   | 1     |
| B.1.2     | 1     |
| B.1.385   | 1     |
| AY.46.6.1 | 1     |
| AY.46.3   | 1     |
| AZ.3      | 1     |
| B.1.617.1 | 1     |
| B.1.396   | 1     |
| BA.1.13.1 | 1     |
